# Supplementary material
Source: PubMed Central journal article supplement (PMC9912132)
Supplement: jamaotolaryngolheadnecksurg-e224165-s001.pdf [file jamaotolaryngolheadnecksurg-e224165-s001.pdf]

## Supplemental Online Content

Singh A, Kitpanit S, Neal B, et al. Osteoradionecrosis of the jaw following proton radiation therapy for patients with head and neck cancer. *JAMA Otolaryngol Head Neck Surg*. Published online December 22, 2022. doi:10.1001/jamaoto.2022.4165

**eTable.** Summary of Patient Demographics, Tumor Characteristics, and Radiation Therapy Details

This supplemental material has been provided by the authors to give readers additional information about their work.

eTable. Summary of Patient Demographics, Tumor Characteristics, and Radiation Therapy Details

| Patient No./age decade | Tumor      |           |                                 |         | Prescribed radiation dose to primary tumor | Concurrent chemotherapy            | Pre-PRT dental evaluation | Comorbidities | Smoker |
|------------------------|------------|-----------|---------------------------------|---------|--------------------------------------------|------------------------------------|---------------------------|---------------|--------|
|                        | Laterality | Histology | Site                            | Stage   |                                            |                                    |                           |               |        |
| 1/70s                  | Right      | SCC       | Maxillary alveolus              | T4bN1M0 | 50 Gy + 26 GyRBE boost                     | Cetuximab                          | Yes                       | HTN           | Former |
| 2/80s                  | Left       | SCC       | Buccal mucosa                   | T2N0M0  | 60 GyRBE                                   | Nil                                | No                        | HTN           | Never  |
| 3/70s                  | Right      | SCC       | Buccal mucosa                   | T2N1M0  | 66 GyRBE                                   | Nil                                | Yes                       | None          | Former |
| 4/60s                  | Left       | ACC       | Hard palate                     | T1NxM0  | 66 GyRBE                                   | Nil                                | Yes                       | HTN           | Never  |
| 5/60s                  | Right      | SCC       | Retromolar trigone, hard palate | T4N2M0  | 50 Gy + 26 GyRBE boost                     | Carboplatin, paclitaxel, cetuximab | No                        | HTN, DM       | Never  |
| 6/40s                  | Left       | ACC       | Hard palate                     | T4NxM0  | 76 GyRBE                                   | Nil                                | Yes                       | HTN, DM       | Former |
| 7/50s                  | Left       | SCC       | Base of tongue                  | T1N1M0  | 70 GyRBE                                   | Carboplatin, fluorouracil          | Yes                       | HTN           | Former |
| 8/60s                  | Right      | SCC       | Tonsil                          | T2N0M0  | 70 GyRBE                                   | Cisplatin                          | No                        | None          | Former |
| 9/50s                  | Left       | SCC       | Tonsil                          | T3N2bM0 | 70 GyRBE                                   | Cisplatin                          | No                        | None          | Never  |
| 10/50s                 | Left       | MEC       | Base of tongue                  | T2N0M0  | 66 GyRBE                                   | Cisplatin                          | No                        | None          | Former |
| 11/60s                 | Right      | SCC       | Base of tongue                  | T2N1M0  | 66 GyRBE                                   | Cisplatin                          | Yes                       | None          | Never  |
| 12/30s                 | Left       | SCC       | Retromolar trigone              | T4aN0M0 | 60 GyRBE                                   | Nil                                | No                        | HTN           | Never  |
| 13/60s                 | Right      | ACC       | Floor of mouth                  | T3N0M0  | 66 GyRBE                                   | Nil                                | No                        | HTN           | Former |

Abbreviations: ACC, adenoid cystic carcinoma; DM, diabetes mellitus; Gy, gray; GyRBE, gray relative biologic equivalent; HTN, hypertension; MEC, mucoepidermoid carcinoma; PRT, proton radiation therapy; SCC, squamous cell carcinoma.
